# Supplementary material for: In-house ELISA protocols for capsid p24 detection of diverse HIV isolates
Source: Springer Nature journal article supplement (doi:10.1186/s12985-023-02242-5), 2023-11-17
Supplement: MOESM1 [file 26317674]

Additional File 1 for:

**In-house ELISA protocols for capsid p24 detection of diverse HIV isolates**

Mariano A. Molina<sup>1</sup>, Monique Vink<sup>1</sup>, Ben Berkhout<sup>1</sup>, Elena Herrera-Carrillo<sup>1,\*</sup>

<sup>1</sup>Department of Medical Microbiology, Laboratory of Experimental Virology, Amsterdam UMC, AMC, University of Amsterdam, Amsterdam, the Netherlands

\*Correspondence: Elena Herrera-Carrillo, e.herreracarrillo@amsterdamumc.nl

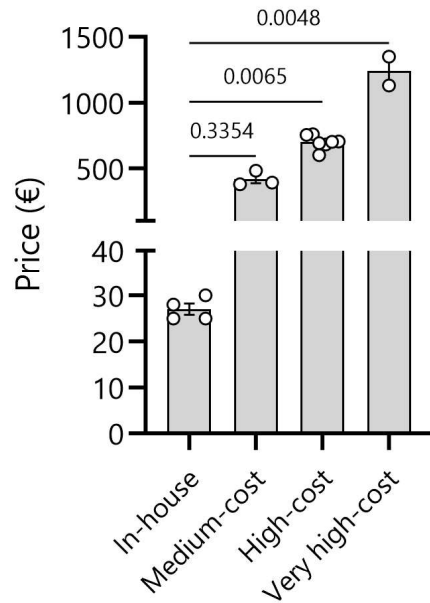

**Figure S1. Comparison of costs between in-house and commercial ELISA kits.** The costs per assay (one 96-well plate) for ABR-, ANG-, SB-, and RND-CA-p24 ELISAs are €25, €25, €30, and €28, respectively, including the costs for the reagents necessary for use (Tables 3-6). These costs are lower than medium-cost kits (mean €418) and significantly lower than high-cost (mean €699) and very high-cost kits (mean €1240). Differences in costs were analyzed by using a Kruskal-Wallis' test followed by the Benjamini-Hochberg test correction. *q* values are shown in the graph. *q* values < 0.10 are considered significant.

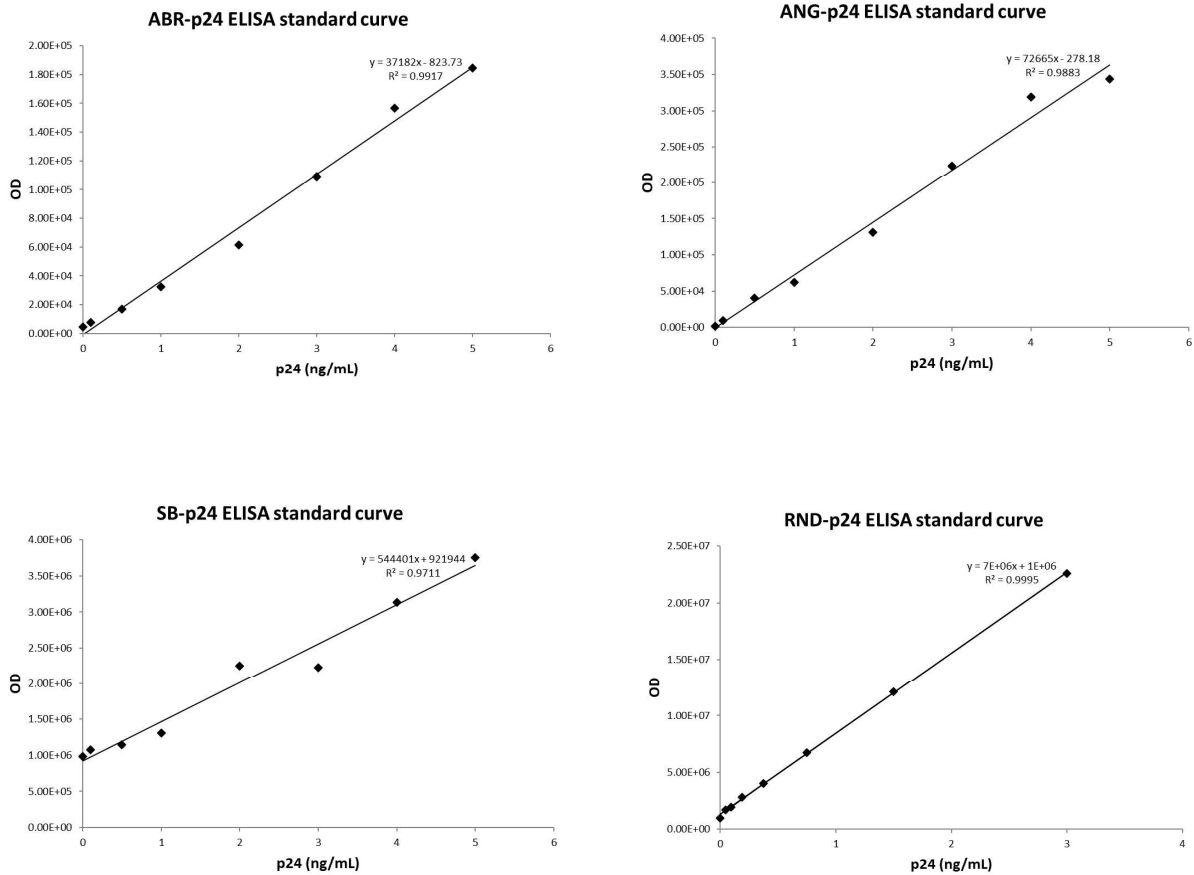

**Figure S2. Standard curves for CA-p24 ELISAs.** Standard curves generated by ABR-, ANG-, SB-, and RND-CA-p24 ELISAs demonstrate the detection limits of the assays. ABR-, ANG-, and SB-CA-p24 ELISAs can detect CA-p24 antigen up to 5 ng/mL, whereas RND-CA-p24 ELISA can detect CA-p24 antigen up to 3 ng/mL. The high correlation ( $R^2 \geq 0.97$ ) between CA-p24 protein standard concentrations and the measured optical density (OD) in all assays further show the accuracy of each system.

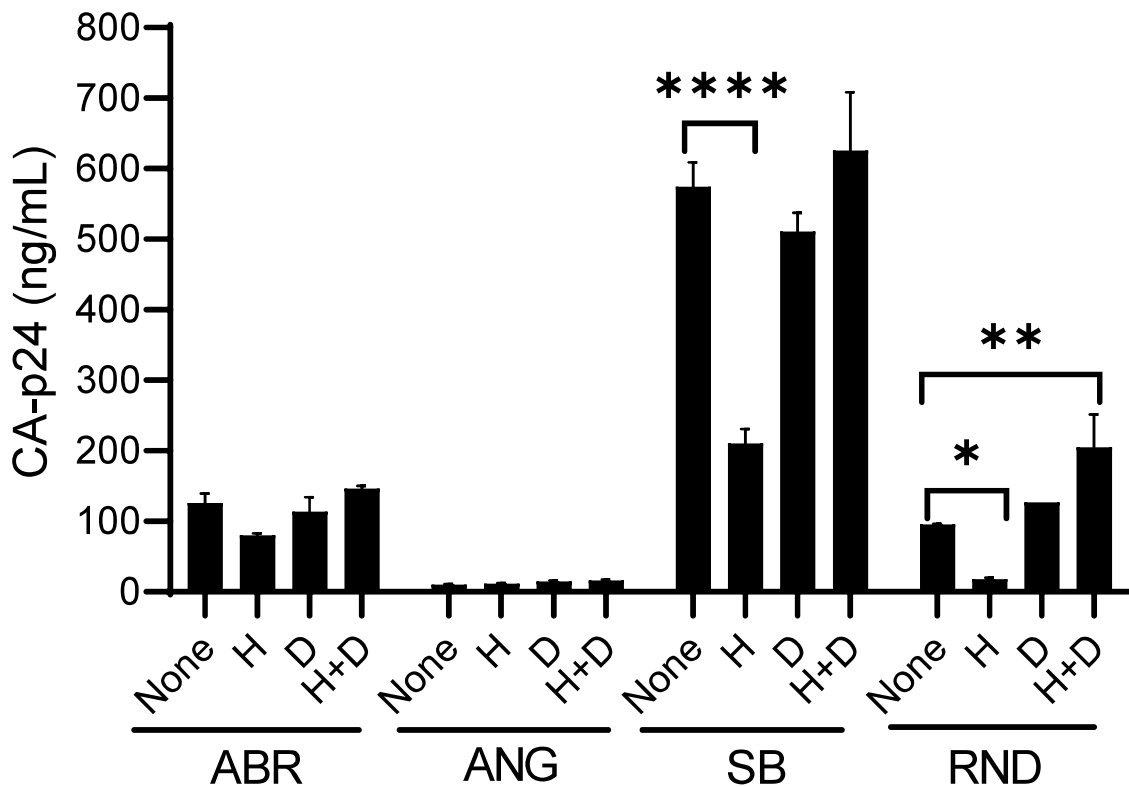

**Figure S3. Effect of viral inactivation on assay performance and within-assay reproducibility of ELISA systems.** The ABR-, ANG-, SB-, and RND-CA-p24 ELISAs were tested for the effect of heat (H) and detergent-inactivation (D) on their CA-p24 quantitation using the NL4-3 HIV-1 strain as a model. Four conditions were tested: heat- along detergent-inactivation (H+D), no heat- or detergent-inactivation (None), heat-inactivation alone (H), and detergent-inactivation alone (D). The data represent the mean  $\pm$  standard deviation (SD) of two experiments. Statistical analyses (two-way ANOVA followed by Tukey's post hoc test were performed, and differences among groups were considered significant when the corresponding  $p$  value was less than 0.05 (\*  $p < 0.05$ ; \*\*  $p < 0.01$ ; \*\*\*  $p < 0.001$ ; \*\*\*\*  $p < 0.0001$ ).

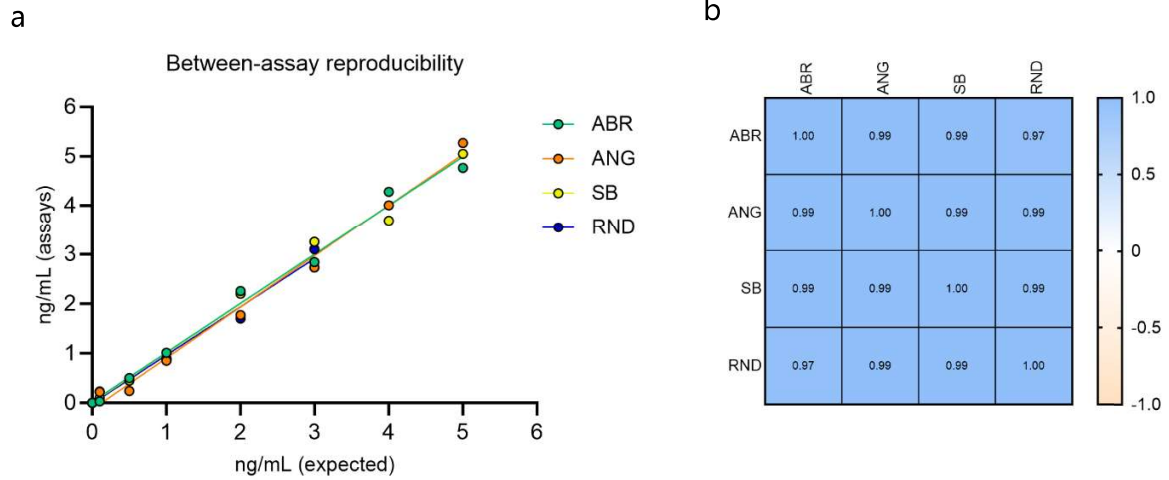

**Figure S4. Between-assay reproducibility of the ELISA protocols.** **a.** Analysis of the CA-p24 analysis and between-assay reproducibility by ABR-, ANG-, SB-, and RND-CA-p24 ELISAs using different concentrations of the CA-p24 standard protein (Tables 3-6). The detected CA-p24 concentrations by all assays corresponded to the expected concentrations in ng/mL. **b.** The CA-p24 measurements exhibited a significantly high positive correlation between all assays as tested by Pearson  $r$  correlation tests ( $p < 0.002$ ), demonstrating the between-assay reproducibility of the ELISA systems.
