# Supplementary material for: In-house ELISA protocols for capsid p24 detection of diverse HIV isolates
Source: Springer Nature journal article supplement (doi:10.1186/s12985-023-02242-5), 2023-11-17
Supplement: MOESM2 [file 26317674]

Additional File 2 for:

**In-house ELISA protocols for capsid p24 detection of diverse HIV isolates**

Mariano A. Molina<sup>1</sup>, Monique Vink<sup>1</sup>, Ben Berkhout<sup>1</sup>, Elena Herrera-Carrillo<sup>1,\*</sup>

<sup>1</sup>Department of Medical Microbiology, Laboratory of Experimental Virology, Amsterdam UMC, AMC, University of Amsterdam, Amsterdam, the Netherlands

\*Correspondence: Elena Herrera-Carrillo, e.herreracarrillo@amsterdamumc.nl

**Supplementary Table 1. List of commercial ELISA kits for comparison analyses.**

| <b>Category</b> | <b>Source</b>         | <b>Identifier</b>   | <b>Price/96-well plate (€)</b> |
|-----------------|-----------------------|---------------------|--------------------------------|
| Medium cost     | XpressBio             | XBR-1000 Ext. Range | 391.65                         |
|                 | XpressBio             | XBR-1000            | 379.84                         |
|                 | Abnova                | KA6284              | 482.52                         |
| High cost       | R&D Systems           | DHP240B             | 705.00                         |
|                 | RayBiotech            | IQV-HIVP24-1        | 759.00                         |
|                 | abcam                 | ab218268            | 755.00                         |
|                 | TaKaRa                | 631476              | 681.00                         |
|                 | Origene               | EA290002            | 600.00                         |
|                 | Biochain              | Z7040001            | 691.84                         |
|                 | ZeptoMetrix           | 0801111             | 701.96                         |
| Very high cost  | Arigo Biolaboratories | ARG82822_96wells    | 1131.00                        |
|                 | PerkinElmer           | NEK050001KT         | 1348.72                        |

**Supplementary Table 2. Dilutions for the standard curve with the ABR system.**

| Dilutions | Dilution buffer | Working stock      | CA-p24 concentration (ng/mL) |
|-----------|-----------------|--------------------|------------------------------|
| 1         | 1 mL            | 0                  | 0                            |
| 2         | 900 $\mu$ l     | 100 $\mu$ l from 4 | 0.1 ng                       |
| 3         | 900 $\mu$ l     | 100 $\mu$ l from 8 | 0.5 ng                       |
| 4         | 990 $\mu$ l     | 10 $\mu$ l         | 1 ng                         |
| 5         | 980 $\mu$ l     | 20 $\mu$ l         | 2 ng                         |
| 6         | 970 $\mu$ l     | 30 $\mu$ l         | 3 ng                         |
| 7         | 960 $\mu$ l     | 40 $\mu$ l         | 4 ng                         |
| 8         | 950 $\mu$ l     | 50 $\mu$ l         | 5 ng                         |

**Supplementary Table 3. Dilutions for the standard curve with SB and ANG systems.**

| Dilutions | Dilution buffer | Working stock | CA-p24 concentration (ng/mL) |
|-----------|-----------------|---------------|------------------------------|
| 1         | 400 µl          | 0             | 0                            |
| 2         | 800 µl          | 200 µl from 3 | 0.1 ng                       |
| 3         | 500 µl          | 500 µl from 4 | 0.5 ng                       |
| 4         | 500 µl          | 500 µl from 5 | 1 ng                         |
| 5         | 980 µl          | 20 µl         | 2 ng                         |
| 6         | 647 µl          | 20 µl         | 3 ng                         |
| 7         | 480 µl          | 20 µl         | 4 ng                         |
| 8         | 380 µl          | 20 µl         | 5 ng                         |

**Supplementary Table 4. Dilutions for the standard curve with RND system.**

| Dilutions | Dilution buffer | Working stock | CA-p24 concentration (ng/mL) |
|-----------|-----------------|---------------|------------------------------|
| 1         | 200 µl          | 0             | 0                            |
| 2         | 200 µl          | 200 µl from 3 | 0.047 ng                     |
| 3         | 200 µl          | 200 µl from 4 | 0.094 ng                     |
| 4         | 200 µl          | 200 µl from 5 | 0.188 ng                     |
| 5         | 200 µl          | 200 µl from 6 | 0.375 ng                     |
| 6         | 200 µl          | 200 µl from 7 | 0.75 ng                      |
| 7         | 200 µl          | 200 µl from 8 | 1.5 ng                       |
| 8         | 388 µl          | 12 µl         | 3 ng                         |
